# Supplementary material for: Identification of metabolic and protein markers representative of the impact of mild nitrogen deficit on agronomic performance of maize hybrids
Source: PubMed Central journal article supplement — Metabolomics. 2024 Nov 9;20(6):128. doi: 10.1007/s11306-024-02186-z (PMC11550246; doi:10.1007/s11306-024-02186-z), 2024-11-09
Supplement: 11306_2024_2186_MOESM2_ESM.pdf [file 11306_2024_2186_MOESM2_ESM.pdf]

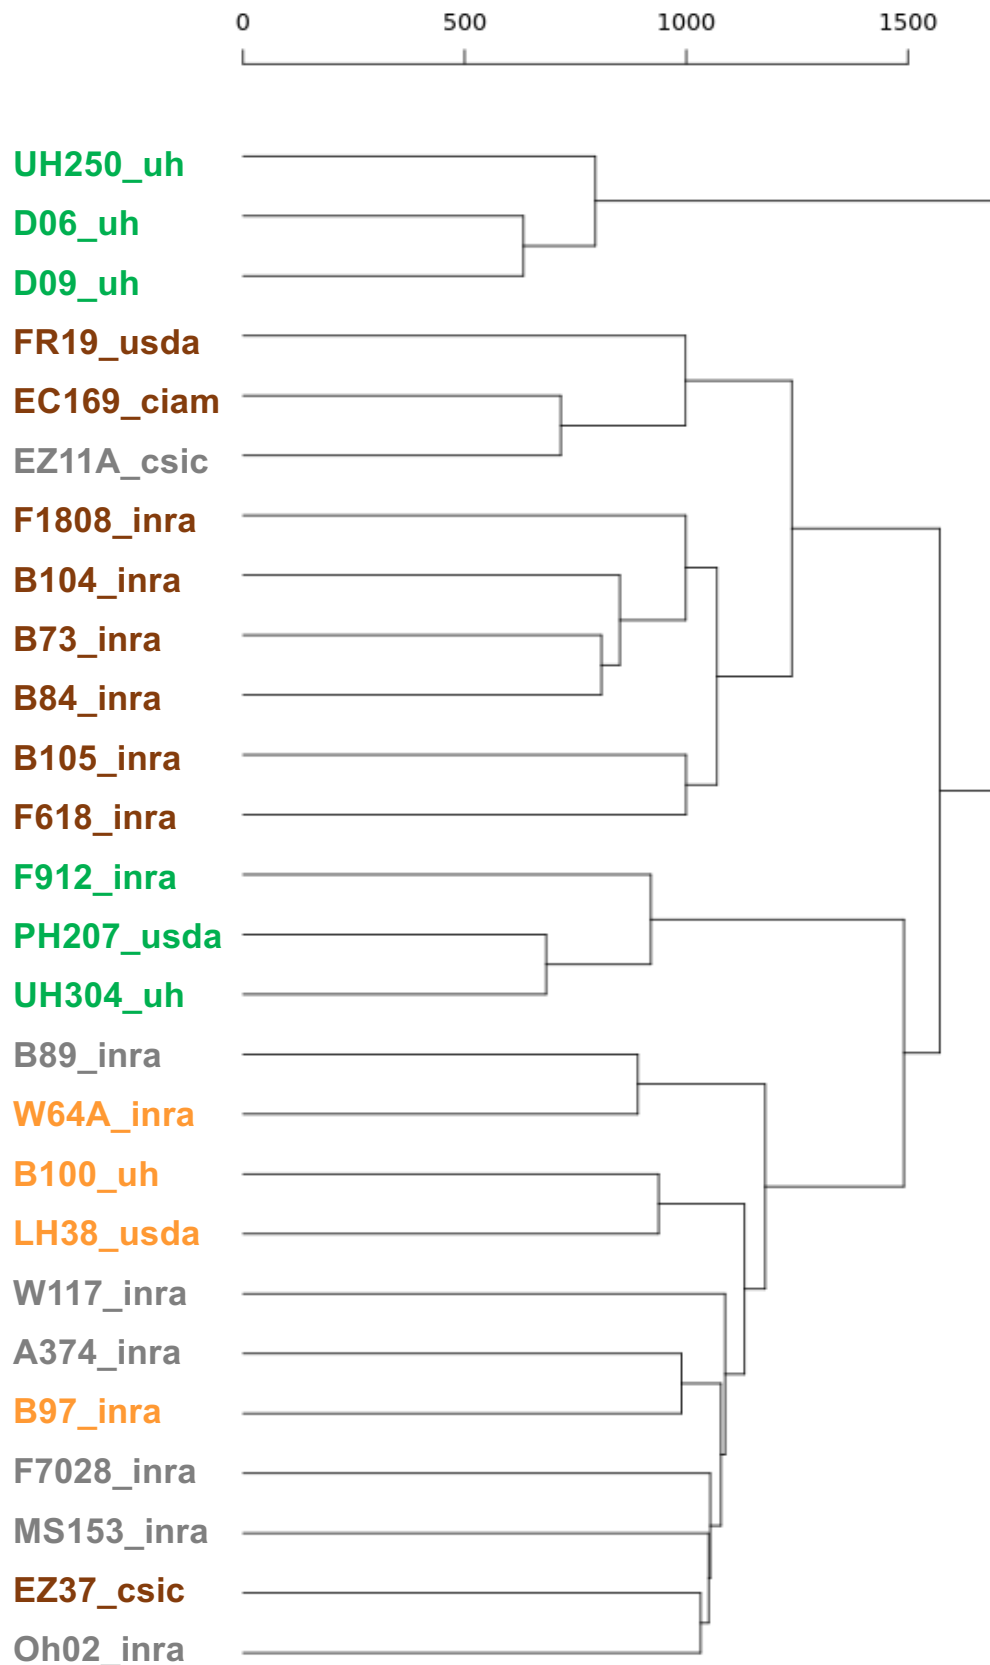

**Figure S1A.** Genetic distance of 26 of the 29 parental lines of the hybrids used in the study. Dendrogram generated using 978,134 genetic markers across the 26 parents, with Euclidean distance and Ward's algorithm. Each line is colored according to its admixture group. European, grey; Iodent, green; Lancaster, orange; Stiff Stalk, brown.

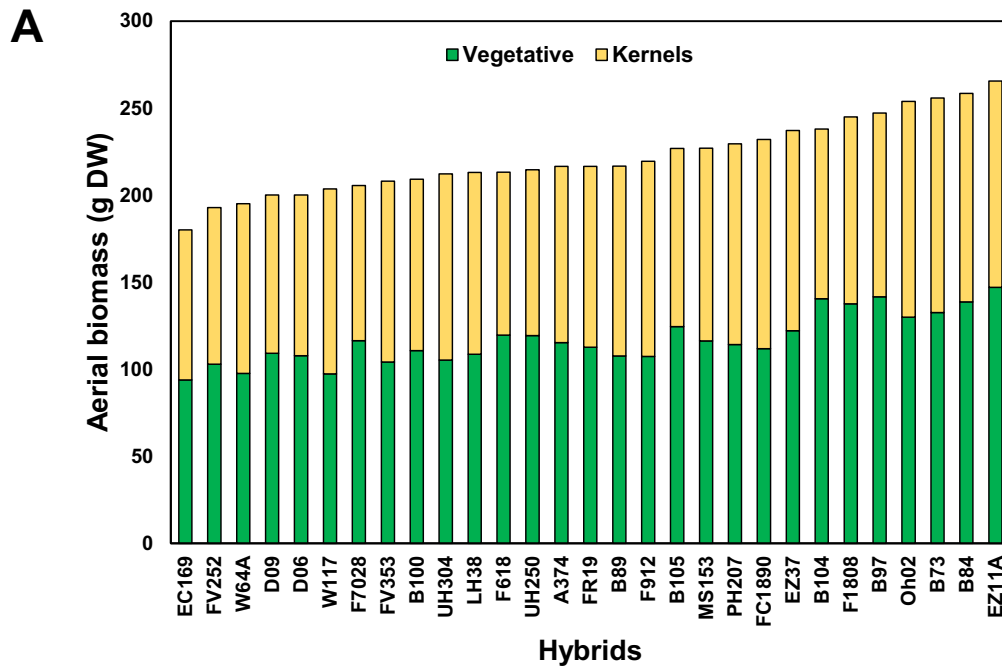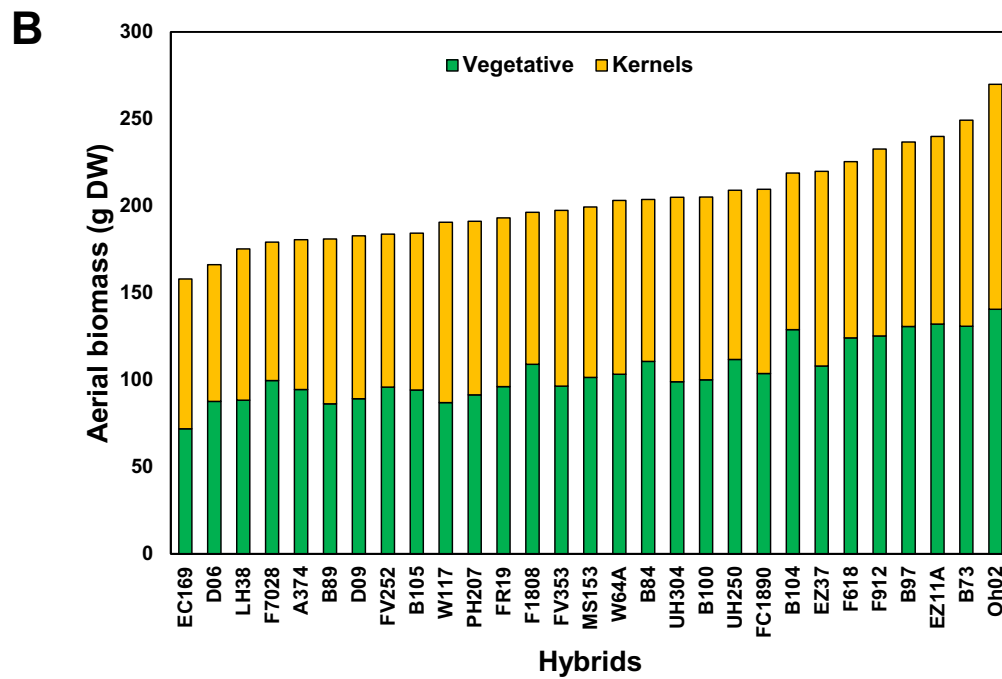

**Figure S1B.** Aerial biomass production of the 29 hybrids grown under optimal (A) and reduced N fertilization conditions (B). The values correspond to the LSmeans of the vegetative and kernel dry weights (DW).
