# Supplementary material for: Identification of metabolic and protein markers representative of the impact of mild nitrogen deficit on agronomic performance of maize hybrids
Source: PubMed Central journal article supplement — Metabolomics. 2024 Nov 9;20(6):128. doi: 10.1007/s11306-024-02186-z (PMC11550246; doi:10.1007/s11306-024-02186-z), 2024-11-09
Supplement: 11306_2024_2186_MOESM4_ESM.pdf [file 11306_2024_2186_MOESM4_ESM.pdf]

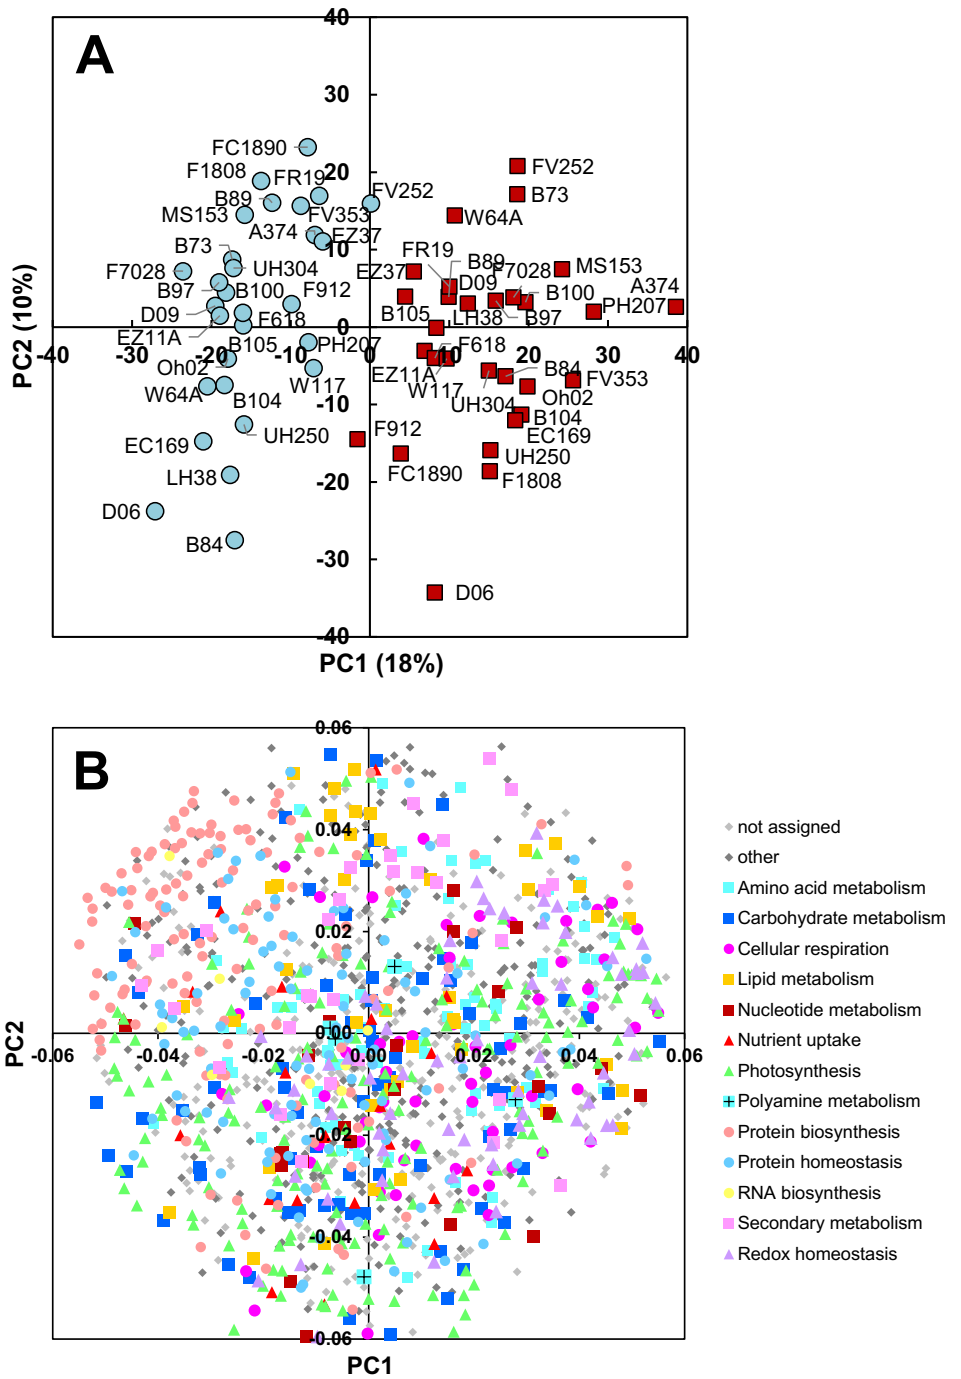

**Figure S3.** PCA of the LS-means calculated from the content of the 1536 proteins signatures measured in the panel of 29 maize hybrids grown under reduced (LN, blue circles) and optimal (HN, red squares) fertilization conditions. **(A)** Scores plot annotated with the hybrid codes. **(B)** Loadings plot in which proteins are colored according to their Mercator bin functional category.
