# Supplementary material for: Identification of metabolic and protein markers representative of the impact of mild nitrogen deficit on agronomic performance of maize hybrids
Source: PubMed Central journal article supplement — Metabolomics. 2024 Nov 9;20(6):128. doi: 10.1007/s11306-024-02186-z (PMC11550246; doi:10.1007/s11306-024-02186-z), 2024-11-09
Supplement: 11306_2024_2186_MOESM5_ESM.pdf [file 11306_2024_2186_MOESM5_ESM.pdf]

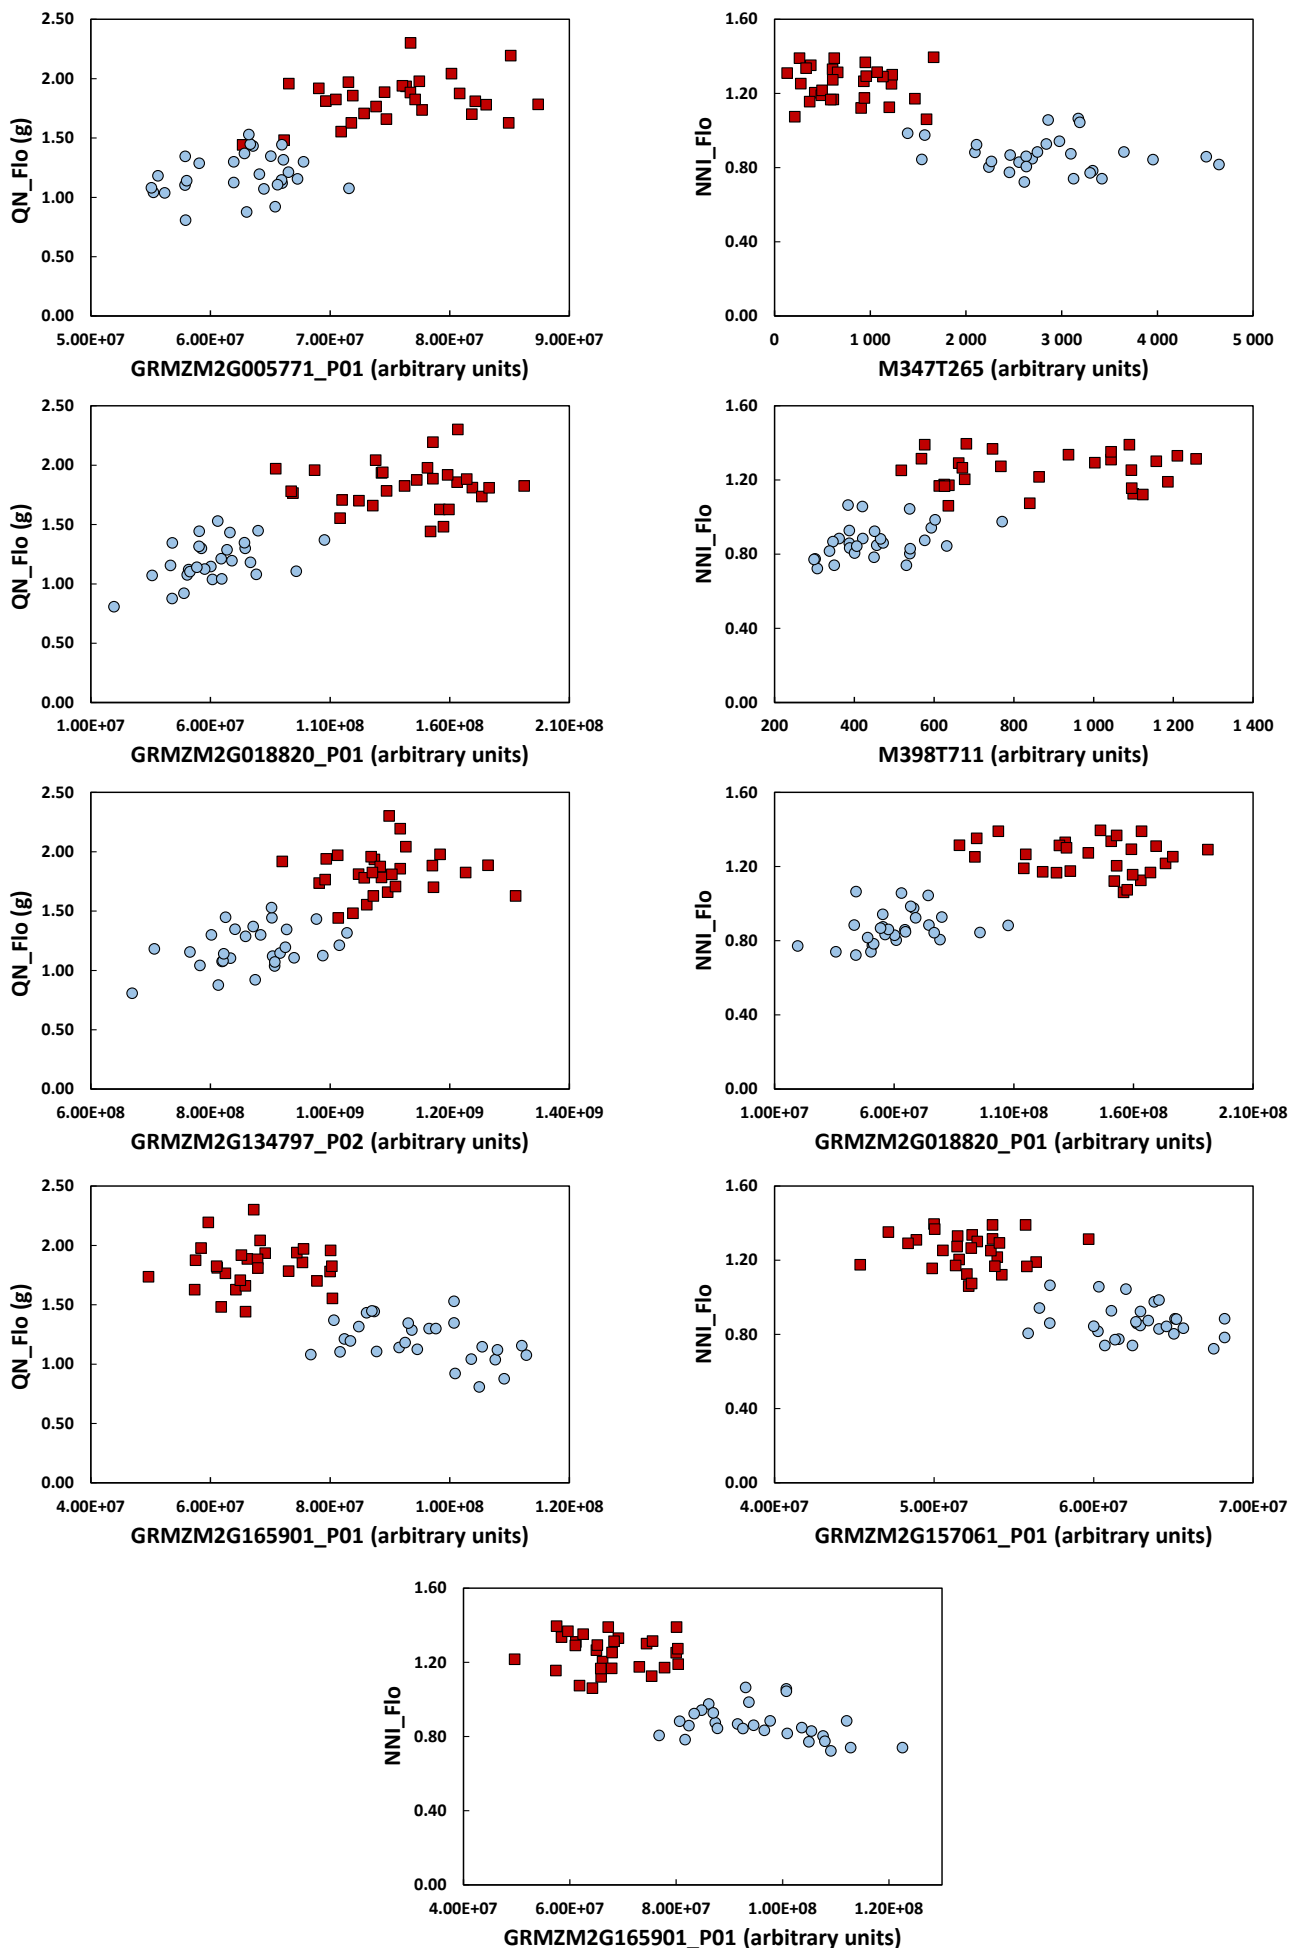

**Figure S4.** Biplots of the metabolite signatures and proteins measured in the 29 maize hybrids and directly correlated to NNI\_Flo and to QN\_Flo in the Spearman correlation network presented in Figure 4 and listed in Table S7. LN: reduced N fertilization (blue circles). HN: non-limiting N fertilization (red squares).
