# Supplementary material for: Identification of metabolic and protein markers representative of the impact of mild nitrogen deficit on agronomic performance of maize hybrids
Source: PubMed Central journal article supplement — Metabolomics. 2024 Nov 9;20(6):128. doi: 10.1007/s11306-024-02186-z (PMC11550246; doi:10.1007/s11306-024-02186-z), 2024-11-09
Supplement: 11306_2024_2186_MOESM6_ESM.pdf [file 11306_2024_2186_MOESM6_ESM.pdf]

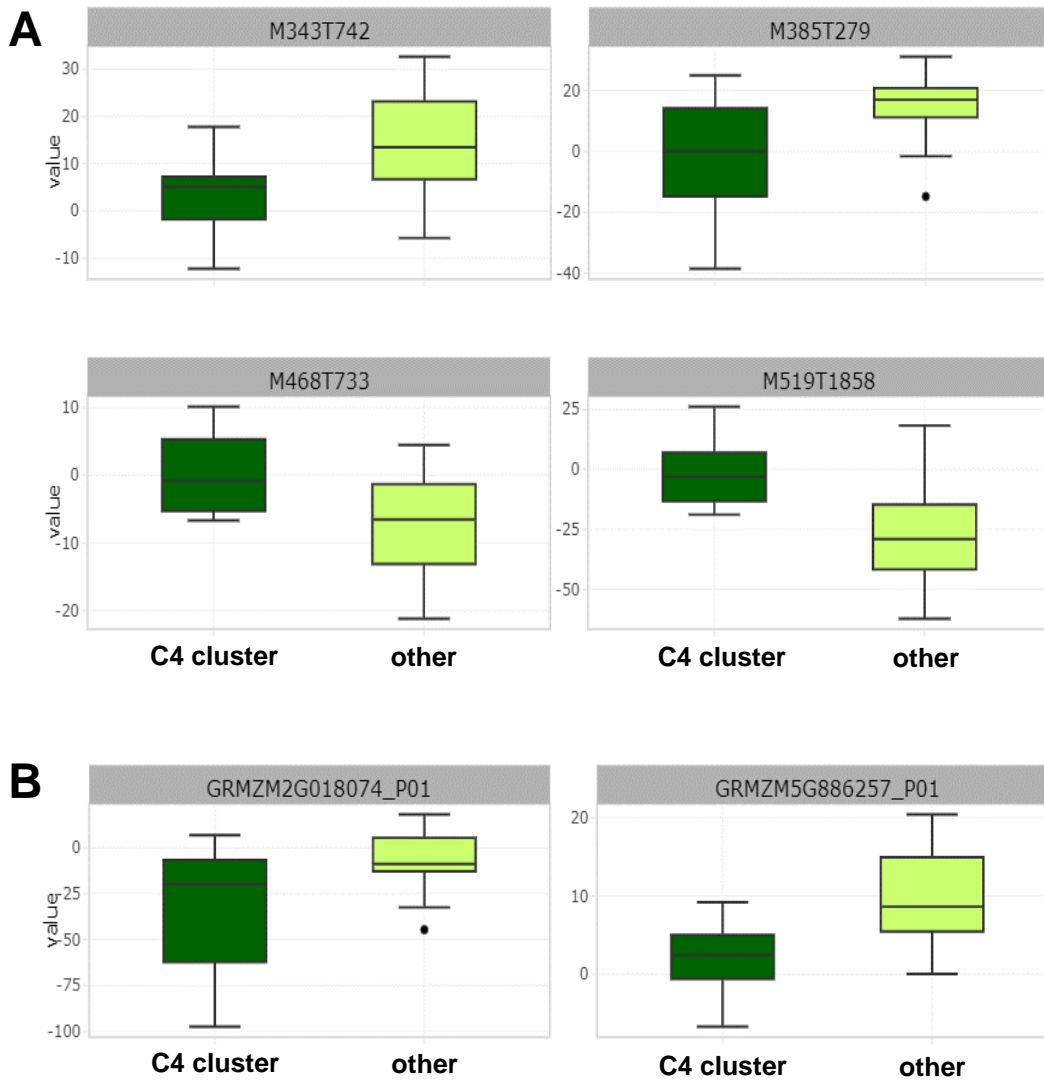

**Supplementary Figure 5.** Metabolites (**A**) and proteins (**B**) susceptibilities to N deficiency significantly modified in the hybrids belonging to cluster C4 previously identify following HCA analysis (see Figure 5). A one-way ANOVA ( $P < 0.01$ ) analysis was performed with:  $n = 9$  hybrids belonging to cluster C4 and all the other 20 hybrids grouped as others.
